# Supplementary material for: Systematic design of superaerophobic nanotube-array electrode comprised of transition-metal sulfides for overall water splitting
Source: PubMed Central journal article supplement (PMC6014975; doi:10.1038/s41467-018-04888-0), 2018-06-22
Supplement: 41467_2018_4888_MOESM3_ESM.pdf [file 41467_2018_4888_MOESM3_ESM.pdf]

## Description of Additional Supplementary Files

File Name: Supplementary Movie 1

Description: **The overall water splitting process.** The continuous polarization for OWS via chronoamperometric method at a cell voltage of 1.55 V for about 1.5 min. The as-formed H<sub>2</sub> and O<sub>2</sub> bubbles released continuously from the left and the right electrode respectively.
